# Supplementary material for: F and Si dual-doping induced oxygen vacancies in a Na4Fe3(PO4)2P2O7 cathode enables boosting electrochemical performance for sodium storage
Source: Royal Society of Chemistry journal article supplement (doi:10.1039/d4ta05292g), 2024-01-01
Supplement: d4ta05292g1.pdf [file d4ta05292g1.pdf]

## Supporting Information

### **F and Si dual-doping induced oxygen vacancies in $\text{Na}_4\text{Fe}_3(\text{PO}_4)_2\text{P}_2\text{O}_7$ cathode enables boosting electrochemical performance for sodium storage**

Jianhong Gao<sup>ab</sup>, Ziwei Chen<sup>ab</sup>, Jun Cao<sup>a</sup>, Kun Wang<sup>a</sup>, Guangxia Tang<sup>c</sup>, Ming Zhang<sup>d</sup>, Feng Lin<sup>e</sup>, Waqar Ahmad<sup>b</sup>, Min Ling<sup>a\*</sup>, Chengdu Liang<sup>a</sup>, and Jun Chen<sup>ab\*</sup>

a Zhejiang Provincial Key Laboratory of Advanced Chemical Engineering Manufacture Technology, College of Chemical and Biological Engineering, Zhejiang University, Hangzhou 310027, China.

b Institute of Zhejiang University-Quzhou, Zheda Road 99, Quzhou 324000, China.

c State Key Laboratory of Advanced Chemical Power Sources, Guizhou Meiling Power Sources Co., Ltd., Zunyi, Guizhou 563000, China

d Quzhou Jingzhou Technology Development Co., Ltd.

e College of Chemical and Materials Engineering, Quzhou University, Quzhou, 324000, China

\* Corresponding author. E-mail address: [minling@zju.edu.cn](mailto:minling@zju.edu.cn) (Min Ling); [qiujinchen@zju.edu.cn](mailto:qiujinchen@zju.edu.cn) (Jun Chen).

## 1. Experimental Section

### 1.1 Material synthesis

$\text{Na}_4\text{Fe}_3(\text{PO}_4)_2\text{P}_2\text{O}_7$  were synthesized via a simple liquid-phase method. All the reagents using in the synthesis were analytical grade. Firstly, stoichiometric ratios of  $\text{NaH}_2\text{PO}_4$  (99.0% pure, Aladdin),  $\text{Fe}(\text{NO}_3)_3 \cdot 9\text{H}_2\text{O}$  (99.9% pure, Aladdin),  $\text{C}_6\text{H}_8\text{O}_7 \cdot \text{H}_2\text{O}$  (99.5% pure, Aladdin) were added into deionized water, and stirred overnight at room temperature. The yellow-green clear solution was then dried in an oven at 150 °C for 1 h to obtain precursor. After grinding, the precursor powder was pre-calcined at 300 °C for 3 h in tube furnace with a heating rate of 5 °C  $\text{min}^{-1}$ . The obtained powders were further pelletized under 15 MPa and calcined again at 550 °C for 10 h with a heating rate of 5 °C  $\text{min}^{-1}$  (denoted as NFPP). With adding sodium fluoride (NaF, Aladdin) as F source and silicon acetate ( $\text{C}_8\text{H}_{12}\text{O}_8\text{Si}$ , Aladdin) as Si source, F-doped, Si-doped and F/Si dual-doped NFPP ( $\text{Na}_{4+x}\text{Fe}_3(\text{PO}_4)_{2-x}(\text{SiO}_4)_x\text{P}_2\text{O}_7\text{F}_y$ ) were prepared through the same method mentioned above. The exploration of specific doping amount of individual F or Si element was involved to find out the optimal doping amount. Finally, the best dual-anionic-doped  $\text{Na}_{4+x}\text{Fe}_3(\text{PO}_4)_{2-x}(\text{SiO}_4)_x\text{P}_2\text{O}_7\text{F}_y$  sample and control samples were denoted as NFPP-0.1F/0.05Si ( $x=0.05$ ,  $y=0.1$ ), NFPP-0.1F ( $y=0.1$ ), and NFPP-0.05Si ( $x=0.05$ ), respectively.

### 1.2 Material characterization

Field-emission scanning electron microscopy (FESEM) images were collected using Regulus 8230. High-resolution transmission electron microscopy (HRTEM) images, energy dispersive X-ray spectroscopy (EDS) mapping images, and selected area electron diffraction (SAED) pattern were recorded by using a Talos F200X. The measurement of Na/Fe/P stoichiometry was conducted on inductively coupled plasma-atomic emission spectrometry (PE NeXION 5000G). The crystal structure and phase composition of the samples were obtained on a Bruker AXS diffractometer (D8 Advance) using Cu  $K\alpha$  radiation at  $\lambda=1.54$  Å. GSAS software was used for XRD data analysis. The vibrations of the functional groups were observed using Fourier-transform infrared spectroscopy (FTIR). X-ray photoelectron spectroscopy (XPS) was used to confirm the valence of each element in all samples. Room-temperature electron

paramagnetic resonance (EPR) tests were carried out to identify oxygen vacancy on an EPR spectrometer (Bruker E500) using a 9.45 GHz X-band with 5.00 G modulation amplitude and a 100 kHz magnetic field modulation. Thermogravimetric analysis (TGA) and Raman spectroscopy were involved to analyze the carbon content and type of carbon structure. Moreover, to study the sodium storage mechanism, a series of ex-situ characterizations (ex-situ XRD, ex-situ XPS, and ex-situ EPR) were carried out on electrodes. The electrodes were charged/discharged under 0.1 C (1 C=129 mAh g<sup>-1</sup>) until stabilizing at specific voltage platforms.

### **1.3 Electrochemical measurements**

Na half cells and full cells were assembled in an argon-filled glove box for further electrochemical measurements. The slurry, which was composed of 70 wt.% active material, 20 wt.% acetylene black and 10 wt.% poly-vinylidene fluoride (dissolved in N-methyl-2-pyrrolidone), was casted on Al foil to obtain cathodes. Na metal foil was adopted as counter electrode in Na half cells. For anodes in Na full cells, 70 wt.% of hard carbon, 20 wt.% acetylene black and 10 wt.% polyvinylidene fluoride (dissolved in N-methyl-2-pyrrolidone) were mixed together and casted on Al foil. All electrodes were dried at 80 °C overnight in a vacuum and then cut into 10 mm disks. 1 M NaClO<sub>4</sub> dissolved in PC with 5 vol% FEC was used as electrolyte, and Whatman GF/D was used as separator. All cells were aged for 10 h before testing. Electrochemical performance and GITT measurements were studied on Neware battery testing system at 25 °C. All the half cells were pre-activated under a small rate of 0.1 C for 3 cycles and then tested under different rates in the rest cycles. Electrochemical Impedance Spectroscopy (EIS) tests and Cyclic voltammetry (CV) tests were performed on CHI600E electrochemical workstation. The electrochemical impedance spectroscopy (EIS) was measured under a frequency region of 0.01 Hz to 1×10<sup>5</sup> Hz with a voltage amplitude of 5 mV. CV tests were measured at different scanning rates of 0.1, 0.2, 0.4, 0.6, 0.8, 1.0 mV s<sup>-1</sup>, respectively. The GITT tests were carried out at 0.05 C with the pulse time of 30 min and followed by a relaxation period of 120 min. The diffusion coefficient ( $D_{\text{Na}^+}$ ) can be calculated from the GITT profiles using Fick's second law <sup>1,2</sup>:

$$D_{Na^+} = \frac{4}{\pi\tau} \left( \frac{m_B V_m}{M_B S} \right)^2 \left( \frac{\Delta E_S}{\Delta E_\tau} \right)^2$$

where  $\tau$  is the current pulse time;  $m_B$ ,  $M_B$ , and  $V_m$  correspond to the mass, molar mass, and molar volume of the active material, respectively;  $S$  is the geometric area of the electrode;  $\Delta E_S$  and  $\Delta E_\tau$  are the potential difference during the open circuit period and the potential change during a constant current pulse excluding the IR drop, respectively.

#### 1.4 DFT calculation

All calculations in this study were performed with the Vienna ab initio Simulation Package (VASP) within the frame of density functional theory (DFT) <sup>3-5</sup>. The exchange-correlation interactions of electron were described via the generalized gradient approximation (GGA) with PBE functional, and the projector augmented wave (PAW) method was used to describe the interactions of electron and ion <sup>6,7</sup>. Additionally, the DFT-D3 method was used to account for the long-range van der Waals forces present within the system and the DFT+U method was used for the description of d electrons of Fe <sup>8</sup>. The Monkhorst-Pack scheme was used for the integration in the irreducible Brillouin zone. The kinetic energy cut-off of 450 eV was chosen for the plane wave expansion. The lattice parameters and ionic position were fully relaxed, and the total energy was converged within  $10^{-5}$  eV per formula unit. The final forces on all ions are less than  $0.02 \text{ \AA}^{-1}$ . For the calculation of  $\text{Na}^+$  migration, the CINEB method was employed.

**Table S1.** XRD Rietveld refinement results of NFPP.

| <b>Atom</b> | <b>x</b> | <b>y</b> | <b>z</b> | <b>Occ.</b> | <b>Iso.</b> |
|-------------|----------|----------|----------|-------------|-------------|
| Na1         | 0.007964 | 0.477807 | 0.334332 | 0.9543      | 0.02500     |
| Na2         | 0.032933 | 0.044526 | 0.487179 | 0.9994      | 0.03885     |
| Na3         | 0.201214 | 0.224058 | 0.374319 | 0.9518      | 0.03484     |
| Na4         | 0.393154 | 0.241438 | 0.230936 | 0.9639      | 0.01576     |
| Fe1         | 0.132806 | 0.494709 | 0.077564 | 0.9449      | 0.03786     |
| Fe2         | 0.162740 | 0.010051 | 0.090327 | 1.0000      | 0.03526     |
| Fe3         | 0.240853 | 0.744652 | 0.344680 | 0.9813      | 0.00773     |
| P1          | 0.048750 | 0.233178 | 0.040947 | 0.9593      | 0.02992     |
| P2          | 0.057967 | 0.758633 | 0.207642 | 1.0000      | 0.08872     |
| P3          | 0.179439 | 0.480864 | 0.587750 | 1.0000      | 0.01022     |
| P4          | 0.291446 | 0.506806 | 0.055350 | 1.0000      | 0.06516     |
| O1          | 0.000000 | 0.150335 | 0.203096 | 1.0000      | 0.02500     |
| O2          | 0.009342 | 0.233475 | 0.774608 | 0.9999      | 0.00584     |
| O3          | 0.026123 | 0.367733 | 0.105446 | 1.0000      | 0.02500     |
| O4          | 0.042174 | 0.612302 | 0.103328 | 1.0000      | 0.01671     |
| O5          | 0.122024 | 0.763445 | 0.374766 | 1.0000      | 0.11208     |
| O6          | 0.127611 | 0.223065 | 0.000923 | 1.0000      | 0.05114     |
| O7          | 0.114075 | 0.423760 | 0.380011 | 0.7774      | 0.15322     |
| O8          | 0.150567 | 0.046919 | 0.407848 | 1.0000      | 0.11116     |
| O9          | 0.235820 | 0.412763 | 0.614743 | 1.0000      | 0.57364     |
| O10         | 0.252270 | 0.597089 | 0.112004 | 1.0000      | 0.01133     |
| O11         | 0.246385 | 0.370125 | 0.059641 | 1.0000      | 0.00136     |
| O12         | 0.269218 | 0.116764 | 0.036574 | 1.0000      | 0.00298     |
| O13         | 0.358077 | 0.463381 | 0.263913 | 1.0000      | 0.02500     |
| O14         | 0.379858 | 0.035428 | 0.262517 | 0.9935      | 0.03974     |
| O15         | 0.406960 | 0.377225 | 0.600540 | 1.0000      | 0.01891     |

**Table S2.** XRD Rietveld refinement results of NFPP-0.1F.

| <b>Atom</b> | <b>x</b> | <b>y</b> | <b>z</b> | <b>Occ.</b> | <b>Iso.</b> |
|-------------|----------|----------|----------|-------------|-------------|
| Na1         | 0.001758 | 0.478034 | 0.352608 | 1.0000      | 0.02500     |
| Na2         | 0.035938 | 0.041516 | 0.491298 | 1.0000      | 0.04186     |
| Na3         | 0.204500 | 0.247200 | 0.319400 | 0.9774      | 0.02480     |
| Na4         | 0.394100 | 0.263500 | 0.243300 | 1.0000      | 0.02500     |
| Fe1         | 0.138086 | 0.507582 | 0.075999 | 0.9903      | 0.02100     |
| Fe2         | 0.163750 | 0.001363 | 0.087011 | 0.9991      | 0.02811     |
| Fe3         | 0.242901 | 0.746028 | 0.340068 | 0.9800      | 0.01226     |
| P1          | 0.052159 | 0.234447 | 0.041269 | 1.0000      | 0.03440     |
| P2          | 0.063858 | 0.756463 | 0.209262 | 1.0000      | 0.04658     |
| P3          | 0.180700 | 0.487496 | 0.591078 | 0.9985      | 0.01115     |
| P4          | 0.298788 | 0.501684 | 0.063288 | 0.9611      | 0.05916     |
| O1          | 0.000000 | 0.151595 | 0.208546 | 1.0000      | 0.02500     |
| O2          | 0.014420 | 0.203628 | 0.792826 | 0.9967      | 0.05142     |
| O3          | 0.040617 | 0.368821 | 0.073960 | 1.0000      | 0.02634     |
| O4          | 0.054176 | 0.639734 | 0.104786 | 1.0000      | 0.02500     |
| O5          | 0.117852 | 0.765305 | 0.381983 | 1.0000      | 0.06184     |
| O6          | 0.122732 | 0.192353 | 0.014292 | 1.0000      | 0.08459     |
| O7          | 0.133398 | 0.446819 | 0.397179 | 1.0000      | 0.02500     |
| O8          | 0.156115 | 0.040892 | 0.392298 | 1.0000      | 0.02500     |
| O9          | 0.228035 | 0.383480 | 0.609006 | 1.0000      | 0.02613     |
| O10         | 0.234874 | 0.610428 | 0.104294 | 1.0000      | 0.02500     |
| O11         | 0.245627 | 0.390401 | 0.039343 | 1.0000      | 0.00841     |
| O12         | 0.273127 | 0.107104 | 0.055160 | 1.0000      | 0.02500     |
| O13         | 0.350056 | 0.470455 | 0.258506 | 1.0000      | 0.02500     |
| O14         | 0.371156 | 0.024414 | 0.258506 | 1.0000      | 0.02500     |
| O15         | 0.412540 | 0.368475 | 0.579094 | 1.0000      | 0.02500     |
| F1          | 0.024936 | 0.020623 | 0.017290 | 0.1000      | 0.02500     |

**Table S3.** XRD Rietveld refinement results of NFPP-0.05Si.

| <b>Atom</b> | <b>x</b> | <b>y</b> | <b>z</b> | <b>Occ.</b> | <b>Iso.</b> |
|-------------|----------|----------|----------|-------------|-------------|
| Na1         | 0.008352 | 0.466122 | 0.329478 | 1.0000      | 0.02500     |
| Na2         | 0.044057 | 0.050916 | 0.484553 | 1.0000      | 0.02500     |
| Na3         | 0.203377 | 0.211204 | 0.344446 | 1.0000      | 0.02432     |
| Na4         | 0.396122 | 0.251801 | 0.237956 | 1.0000      | 0.02500     |
| Fe1         | 0.131114 | 0.519639 | 0.078494 | 0.9384      | 0.02500     |
| Fe2         | 0.158993 | 0.002828 | 0.055730 | 0.9840      | 0.02500     |
| Fe3         | 0.231573 | 0.747020 | 0.353743 | 0.9581      | 0.02500     |
| P1          | 0.047719 | 0.236450 | 0.013334 | 0.9973      | 0.02500     |
| P2          | 0.054214 | 0.782638 | 0.218520 | 0.9875      | 0.02500     |
| P3          | 0.171046 | 0.483088 | 0.560815 | 0.9875      | 0.02500     |
| P4          | 0.302322 | 0.509229 | 0.067401 | 0.9875      | 0.02500     |
| O1          | 0.009600 | 0.147500 | 0.174600 | 1.0000      | 0.02500     |
| O2          | 0.013000 | 0.197800 | 0.801800 | 1.0000      | 0.02500     |
| O3          | 0.043400 | 0.369400 | 0.059500 | 1.0000      | 0.02500     |
| O4          | 0.057500 | 0.637200 | 0.104800 | 1.0000      | 0.02500     |
| O5          | 0.122200 | 0.757000 | 0.391000 | 1.0000      | 0.02500     |
| O6          | 0.131300 | 0.188900 | 0.000000 | 1.0000      | 0.02500     |
| O7          | 0.135100 | 0.457300 | 0.388500 | 1.0000      | 0.02500     |
| O8          | 0.161900 | 0.035100 | 0.383000 | 1.0000      | 0.02500     |
| O9          | 0.234000 | 0.374300 | 0.616600 | 1.0000      | 0.02500     |
| O10         | 0.236200 | 0.611800 | 0.111100 | 1.0000      | 0.02500     |
| O11         | 0.240300 | 0.385500 | 0.042800 | 1.0000      | 0.02500     |
| O12         | 0.268000 | 0.103100 | 0.057700 | 1.0000      | 0.02500     |
| O13         | 0.344000 | 0.476400 | 0.251700 | 1.0000      | 0.02500     |
| O14         | 0.373000 | 0.012200 | 0.263300 | 1.0000      | 0.02500     |
| O15         | 0.416100 | 0.369700 | 0.565600 | 1.0000      | 0.02500     |
| Si1         | 0.113246 | 0.613993 | 0.021433 | 0.0125      | 0.02500     |

|     |          |          |          |        |         |
|-----|----------|----------|----------|--------|---------|
| Si2 | 0.054214 | 0.782638 | 0.218520 | 0.0125 | 0.02500 |
| Si3 | 0.171046 | 0.473088 | 0.560815 | 0.0125 | 0.02500 |
| Si4 | 0.302322 | 0.509229 | 0.067401 | 0.0125 | 0.02500 |

**Table S4.** XRD Rietveld refinement results of NFPP-0.1F/0.05Si.

| <b>Atom</b> | <b>x</b> | <b>y</b> | <b>z</b> | <b>Occ.</b> | <b>Iso.</b> |
|-------------|----------|----------|----------|-------------|-------------|
| Na1         | 0.009637 | 0.473133 | 0.352725 | 1.0000      | 0.02500     |
| Na2         | 0.035659 | 0.078196 | 0.494532 | 1.0000      | 0.02500     |
| Na3         | 0.201361 | 0.263824 | 0.356947 | 1.0000      | 0.02500     |
| Na4         | 0.411943 | 0.254953 | 0.237064 | 1.0000      | 0.02500     |
| Fe1         | 0.126760 | 0.524736 | 0.035429 | 0.9220      | 0.02500     |
| Fe2         | 0.158536 | 0.000360 | 0.075650 | 0.9399      | 0.02500     |
| Fe3         | 0.241793 | 0.747081 | 0.347082 | 0.9523      | 0.02500     |
| P1          | 0.051400 | 0.227500 | 0.024500 | 0.9875      | 0.02500     |
| P2          | 0.068000 | 0.763200 | 0.216000 | 0.9875      | 0.02500     |
| P3          | 0.179100 | 0.486400 | 0.583300 | 0.9875      | 0.02500     |
| P4          | 0.292500 | 0.501500 | 0.072900 | 0.9875      | 0.02500     |
| O1          | 0.009600 | 0.147500 | 0.174600 | 1.0000      | 0.02500     |
| O2          | 0.013000 | 0.197800 | 0.801800 | 1.0000      | 0.02500     |
| O3          | 0.043400 | 0.369400 | 0.059500 | 1.0000      | 0.02500     |
| O4          | 0.057500 | 0.637200 | 0.104800 | 1.0000      | 0.02500     |
| O5          | 0.122200 | 0.757000 | 0.391000 | 1.0000      | 0.02500     |
| O6          | 0.131300 | 0.188900 | 0.000000 | 1.0000      | 0.02500     |
| O7          | 0.135100 | 0.457300 | 0.388500 | 1.0000      | 0.02500     |
| O8          | 0.161900 | 0.035100 | 0.383000 | 1.0000      | 0.02500     |
| O9          | 0.234000 | 0.374300 | 0.616600 | 1.0000      | 0.02500     |
| O10         | 0.236200 | 0.611800 | 0.111100 | 1.0000      | 0.02500     |
| O11         | 0.240300 | 0.385500 | 0.042800 | 1.0000      | 0.02500     |
| O12         | 0.268000 | 0.103100 | 0.057700 | 1.0000      | 0.02500     |



|     |          |          |          |        |         |
|-----|----------|----------|----------|--------|---------|
| O13 | 0.344000 | 0.476400 | 0.251700 | 1.0000 | 0.02500 |
| O14 | 0.373000 | 0.012200 | 0.263300 | 1.0000 | 0.02500 |
| O15 | 0.416100 | 0.369700 | 0.565600 | 1.0000 | 0.02500 |
| Si1 | 0.051400 | 0.227500 | 0.024500 | 0.0116 | 0.02500 |
| Si2 | 0.068000 | 0.763200 | 0.216000 | 0.0125 | 0.02500 |
| Si3 | 0.179100 | 0.486400 | 0.583300 | 0.0125 | 0.02500 |
| Si4 | 0.292500 | 0.501500 | 0.072900 | 0.0125 | 0.02500 |
| F1  | 0.268000 | 0.103100 | 0.057700 | 0.1000 | 0.02500 |

**Table S5.** The lattice parameters of as-prepared samples.

| <b>Material</b>  | <b>a [Å]</b> | <b>b [Å]</b> | <b>c [Å]</b> | <b>V [Å<sup>3</sup>]</b> |
|------------------|--------------|--------------|--------------|--------------------------|
| NFPP             | 9.658        | 10.941       | 12.256       | 564.26                   |
| NFPP-0.1F        | 9.666        | 10.939       | 12.284       | 566.37                   |
| NFPP-0.05Si      | 9.776        | 10.928       | 12.262       | 566.43                   |
| NFPP-0.1F/0.05Si | 9.810        | 10.930       | 12.250       | 570.04                   |

**Table S6.** ICP results.

| <b>mass ratio</b> | <b>Na</b> | <b>Fe</b> | <b>P</b> |
|-------------------|-----------|-----------|----------|
| NFPP              | 1.24      | 2.24      | 1.62     |
| NFPP-0.1F         | 1.37      | 2.45      | 1.80     |
| NFPP-0.05Si       | 1.16      | 2.10      | 1.53     |
| NFPP-0.1F/0.05Si  | 1.16      | 2.07      | 1.50     |

**Table S7.** Fe<sup>3+</sup>/Fe<sup>2+</sup> redox couples and corresponding peak-to-peak separation

| <b>sample</b> | <b>Na1 (V)</b> |           | <b>Na4 (V)</b> |           | <b>ΔV1</b> | <b>ΔV4</b> |
|---------------|----------------|-----------|----------------|-----------|------------|------------|
|               | oxidation      | reduction | oxidation      | reduction |            |            |
| NFPP          | 3.01           | 2.85      | 3.26           | 3.18      | 0.16       | 0.08       |
| NFPP-0.1F     | 3.02           | 2.82      | 3.25           | 3.19      | 0.20       | 0.06       |
| NFPP-0.05Si   | 3.02           | 2.84      | 3.25           | 3.18      | 0.18       | 0.07       |

|                  |      |      |      |      |      |      |
|------------------|------|------|------|------|------|------|
| NFPP-0.1F/0.05Si | 2.99 | 2.86 | 3.25 | 3.19 | 0.13 | 0.06 |
|------------------|------|------|------|------|------|------|

**Table S8** The lattice parameters of NFPP-0.1F/0.05Si at different voltage during the initial charge/discharge process in ex-situ XRD test.

| <b>Material</b>    | <b>a [Å]</b> | <b>b [Å]</b> | <b>c [Å]</b> | <b>V [Å<sup>3</sup>]</b> |
|--------------------|--------------|--------------|--------------|--------------------------|
| pristine           | 18.037       | 6.524        | 10.532       | 1239.34                  |
| Charge to 2.8 V    | 17.985       | 6.514        | 10.519       | 1232.38                  |
| Charge to 3.0 V    | 17.946       | 6.512        | 10.460       | 1222.42                  |
| Charge to 3.2 V    | 17.976       | 6.511        | 10.463       | 1224.61                  |
| Charge to 3.6 V    | 18.046       | 6.533        | 10.536       | 1227.14                  |
| Charge to 4.0 V    | 17.929       | 6.520        | 10.471       | 1223.91                  |
| Charge to 4.4 V    | 17.909       | 6.511        | 10.469       | 1220.68                  |
| Discharge to 4.0 V | 17.985       | 6.507        | 10.459       | 1224.15                  |
| Discharge to 3.6 V | 17.972       | 6.519        | 10.482       | 1228.05                  |
| Discharge to 3.2 V | 17.908       | 6.521        | 10.484       | 1224.38                  |
| Discharge to 2.8 V | 17.997       | 6.510        | 10.453       | 1224.69                  |
| Discharge to 2.4 V | 17.954       | 6.505        | 10.473       | 1223.22                  |
| Discharge to 1.4 V | 17.955       | 6.520        | 10.485       | 1227.54                  |

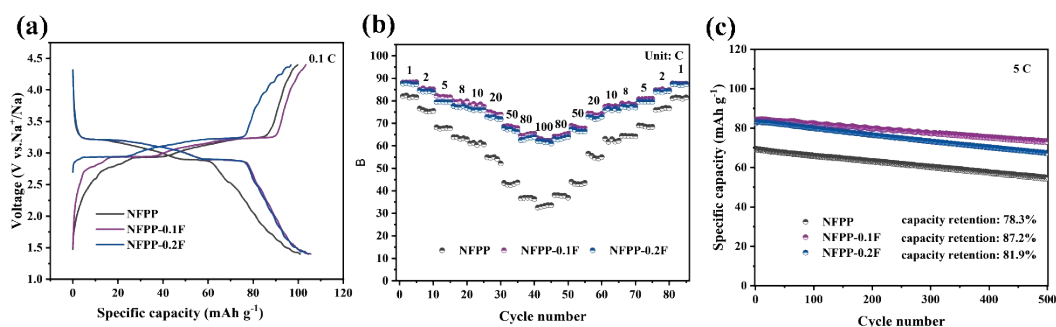

**Figure S1.** The electrochemical performance of different amount of F doped NFPP. (a) Initial charge/discharge profile at 0.1C; (b) Rate performance from 1 C to 100 C; (c) Long cycle performance at 5 C.

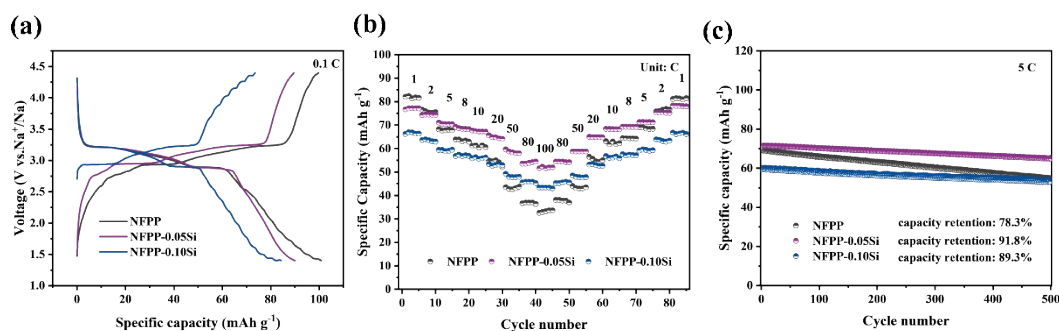

**Figure S2.** The electrochemical performance of different amount of Si doped NFPP. (a) Initial charge/discharge profile at 0.1C; (b) Rate performance from 1 C to 100 C; (c) Long cycle performance at 5 C.

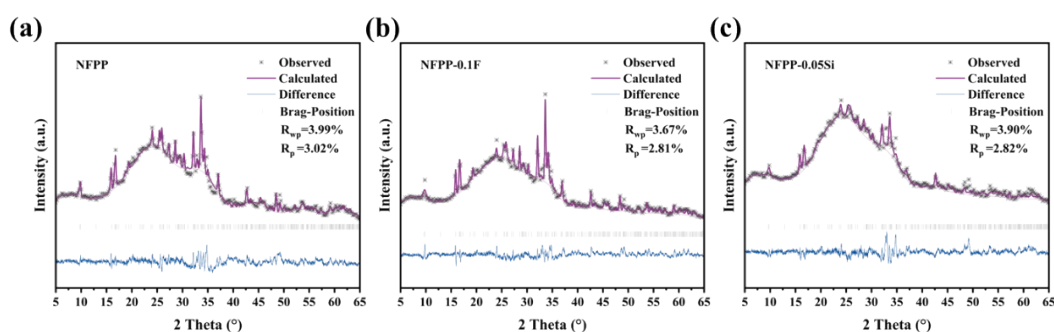

**Figure S3.** Rietveld refinement results of XRD patterns: (a) NFPP; (b) NFPP-0.1F; (C) NFPP-0.05Si.

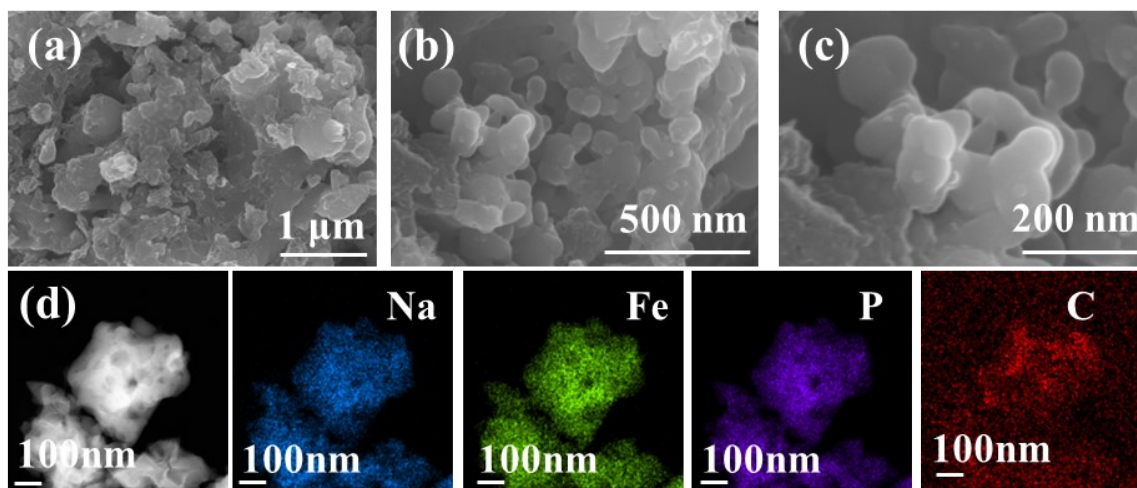

**Figure S4.** The morphology and elemental distribution of NFPP. (a-c) SEM images with different magnifications; (d) EDS elemental mapping images.

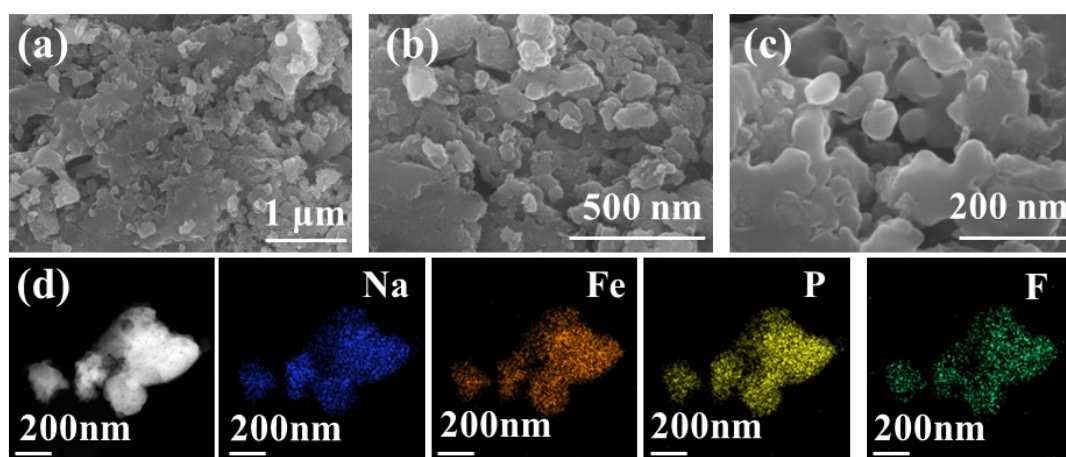

**Figure S5.** The morphology and elemental distribution of NFPP-0.1F. (a-c) SEM images with different magnifications; (d) EDS elemental mapping images.

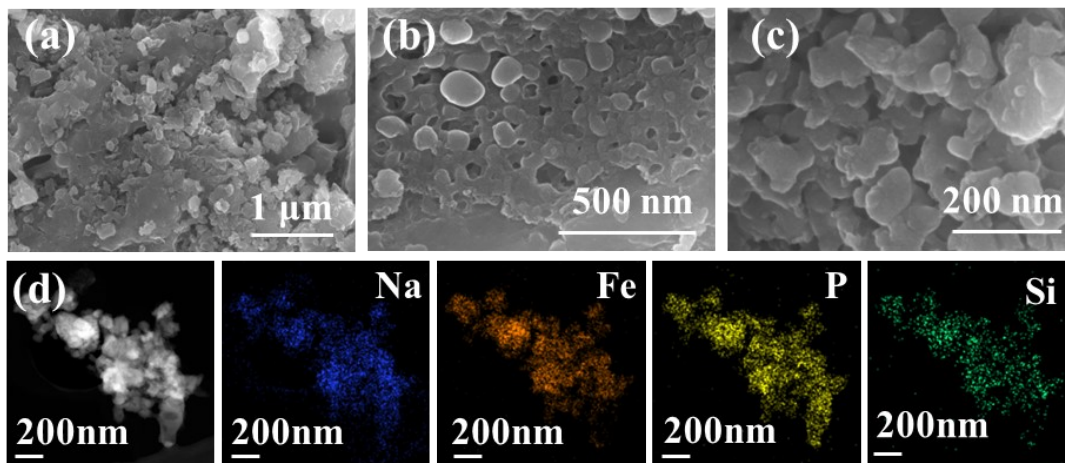

**Figure S6.** The morphology and elemental distribution of NFPP-0.05Si. (a-c) SEM images with different magnifications; (d) EDS elemental mapping images.

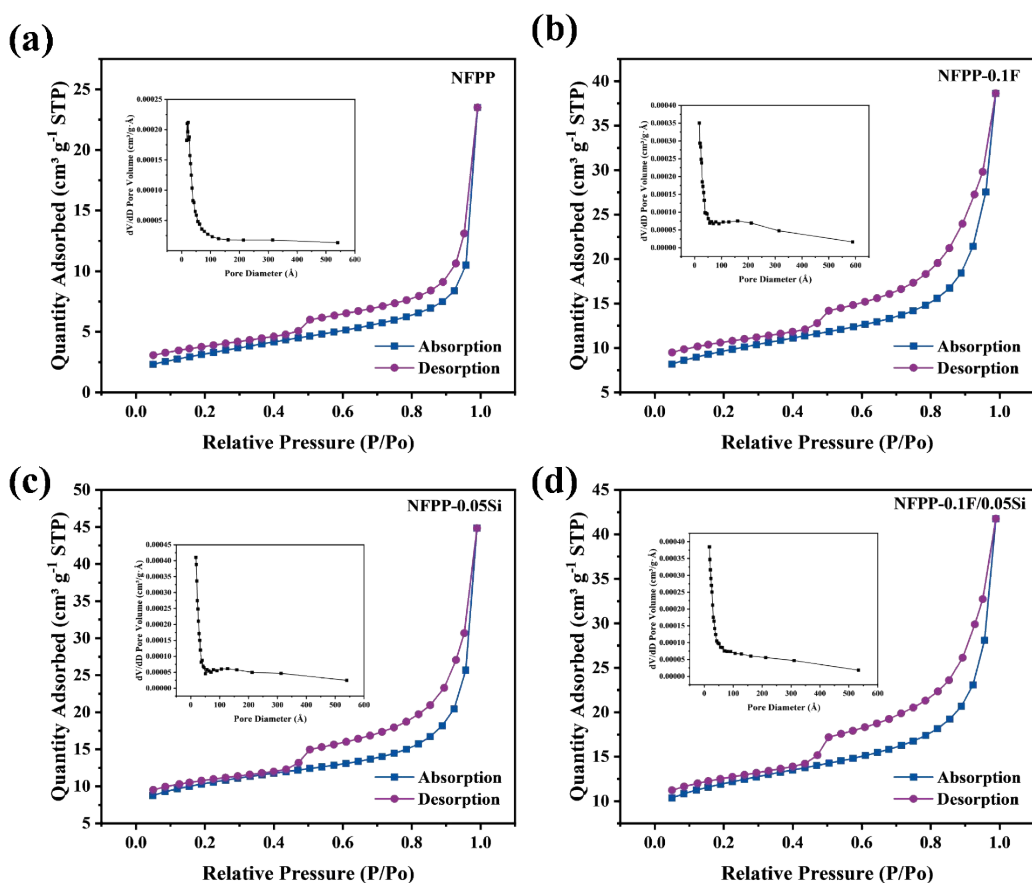

**Figure S7.** Nitrogen adsorption–desorption isotherm and pore-size distribution.

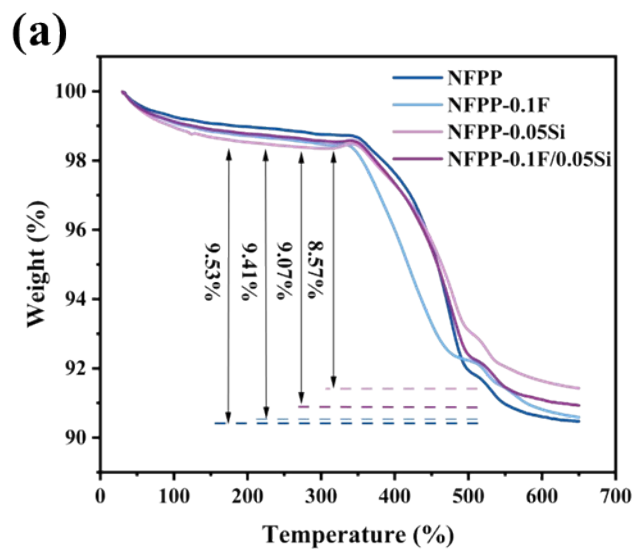

**Figure S8.** TG curves of all composite samples.

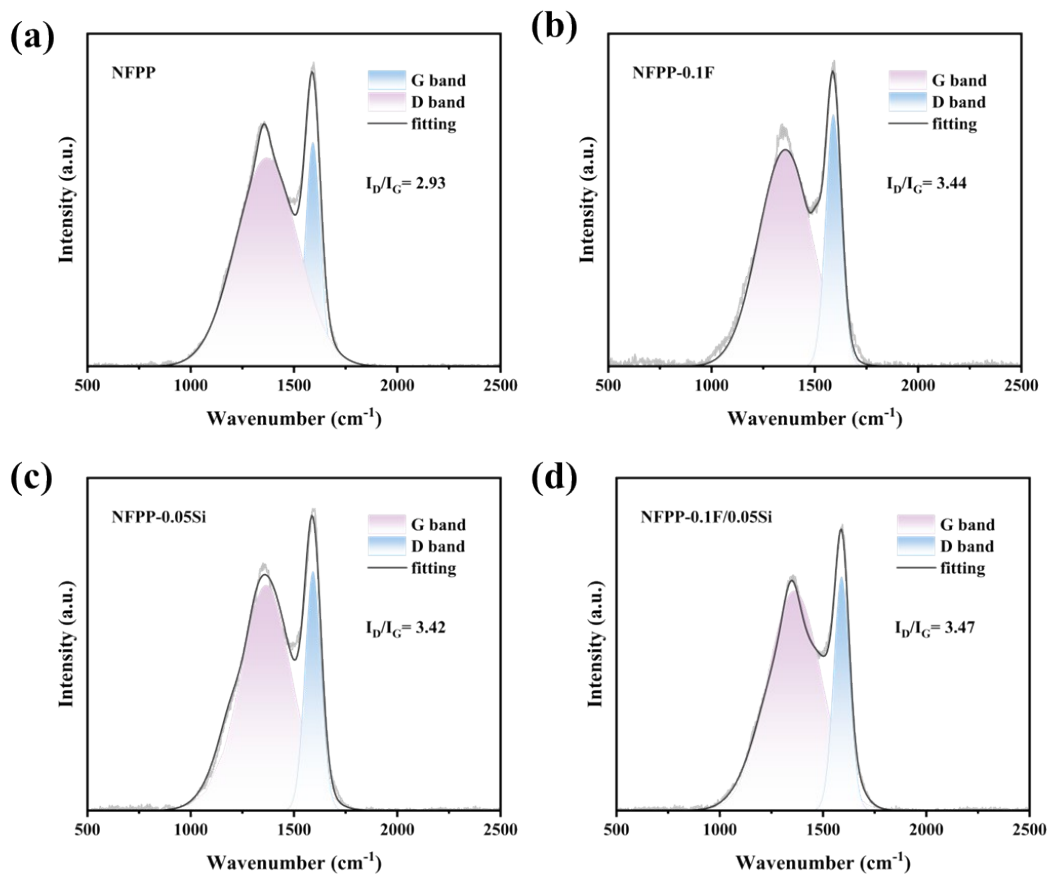

**Figure S9.** Raman spectrum results: (a) NFPP; (b) NFPP-0.1F; (c) NFPP-0.05Si; (d) NFPP-0.1F/0.05Si.

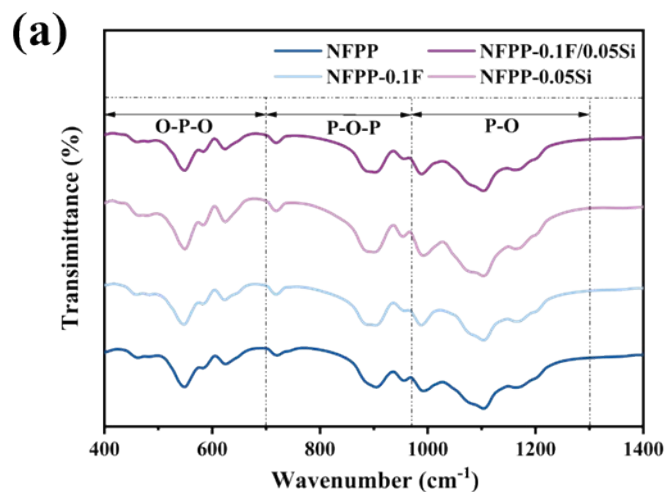

**Figure S10.** FT-IR spectra of all composite samples.

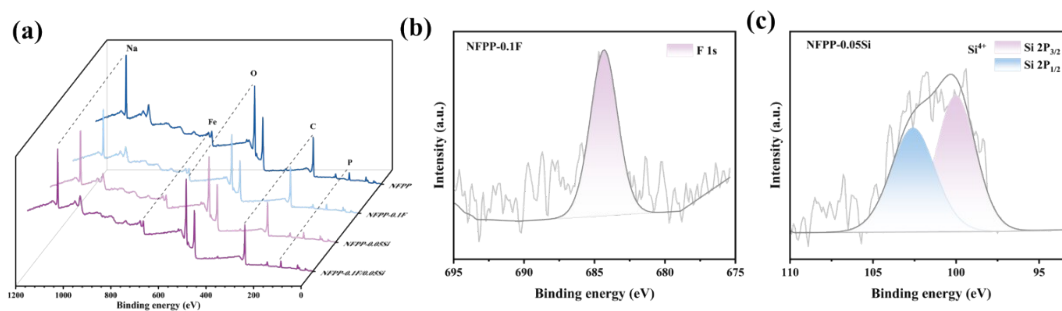

**Figure S11.** (a) XPS survey spectrum of all composite samples; (b) F 1s in NFPP-0.1F sample; (c) Si 2p in NFPP-0.05Si sample.

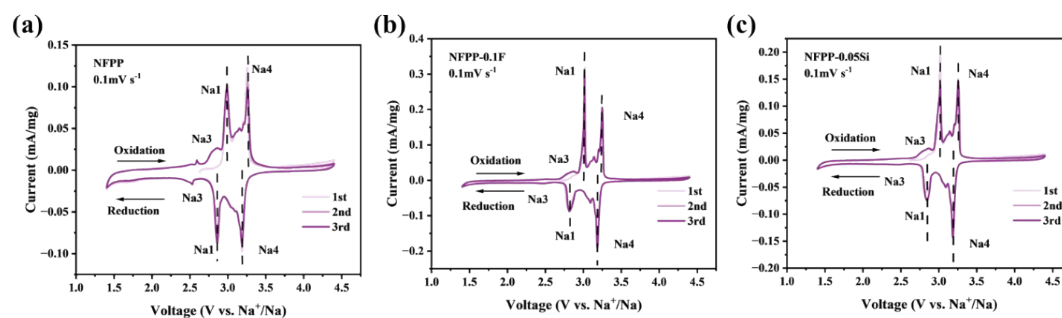

**Figure S12.** CV curves tested between 1.4-4.4 V at  $0.1 \text{ mV s}^{-1}$ , respectively. (a) NFPP; (b) NFPP-0.1F; (c) NFPP-0.05Si.

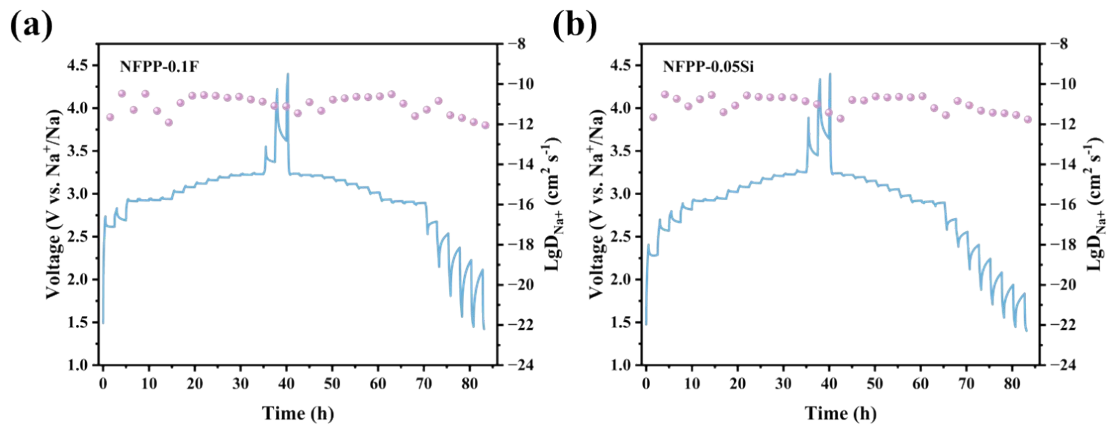

**Figure S13.** GITT curves and corresponding chemical diffusion coefficient of  $\text{Na}^+$  as a function of time calculated: (a) NFPP-0.1F; (b) NFPP-0.05Si.

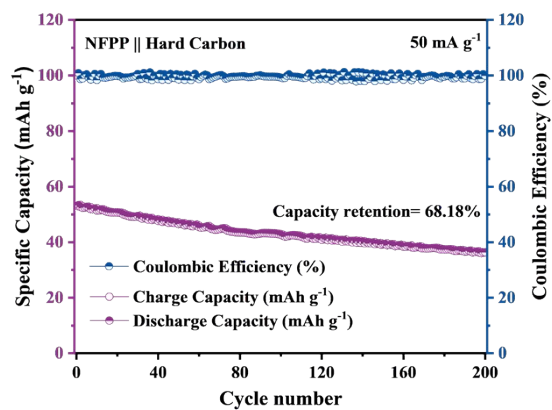

**Figure S14.** Cycling stability of NFPP||hard carbon full cell at  $50 \text{ mA g}^{-1}$  for 200 cycles.

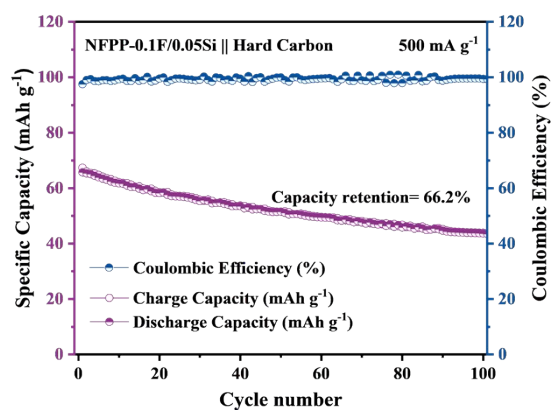

**Figure S15.** Cycling stability NFPP-0.1F/0.05Si||hard carbon full cell at  $500 \text{ mA g}^{-1}$  for 100 cycles.



## References

- 1 Y. Liu, N. Zhang, F. Wang, X. Liu, L. Jiao and L. Fan, *Adv Funct Materials*, 2018, **28**, 1801917.
- 2 X. Ge, H. Li, J. Li, C. Guan, X. Wang, L. He, S. Li, Y. Lai and Z. Zhang, *Small*, 2023, **19**, 2302609.
- 3 G. Kresse and J. Furthmüller, *Computational Materials Science*, 1996, **6**, 15–50.
- 4 G. Kresse and J. Furthmüller, *Phys. Rev. B*, 1996, **54**, 11169.
- 5 J. P. Perdew, K. Burke, M. Ernzerhof, *Phys. Rev. Lett.* 1996, **77**, 3865..
- 6 S. Maintz, V.L. Deringer, A.L. Tchougréeff and R. Dronskowski, *J. Comput. Chem.*, 2013, **34**, 2557–2567.
- 7 P. E. Blöchl, *Phys. Rev. B*, 1994, **50**, 17953.
- 8 G. Kresse and D. Joubert, *Phys. Rev. B*, 1999, **59**, 1758.
